# Supplementary material for: Facile fabrication of oxygen and carbon co-doped carbon nitride nanosheets for efficient visible light photocatalytic H2 evolution and CO2 reduction
Source: Royal Society of Chemistry journal article supplement (doi:10.1039/c9dt02507c), 2019-01-01
Supplement: c9dt02507c1.pdf [file c9dt02507c1.pdf]

## Supporting Information

Facile fabrication of oxygen and carbon co-doped carbon nitride nanosheet for efficient visible light photocatalytic H<sub>2</sub> evolution and CO<sub>2</sub> reduction

Shipeng Wan<sup>a,c</sup>, Man Ou<sup>b,c\*</sup>, Xinming Wang<sup>a,c</sup>, Yanan Wang<sup>a,c</sup>, Yiqing Zeng<sup>a,c</sup>, Jie Ding<sup>a,c</sup>,  
Shule Zhang<sup>a,c</sup>, Qin Zhong<sup>a,c\*</sup>

<sup>a</sup>*School of Chemical Engineering, Nanjing University of Science and Technology, Nanjing, Jiangsu 210094, China*

<sup>b</sup>*School of Energy Science and Engineering, Nanjing Tech University, Nanjing, Jiangsu 211816, PR Chian*

<sup>c</sup>*Nanjing AIREP Environmental Protection Technology Co., Ltd., Nanjing, Jiangsu 210091, China*

*\*Corresponding author: Qin Zhong. Email: zq304@njjust.edu.cn. Tel/Fax number: +86 25 84315517.*

Submitted to *Dalton Transactions*

June, 2019

**Fig. S1** (a) Photocatalytic experimental apparatus; (b-d) GC7900 gas chromatography calibration curves for CO, CH<sub>4</sub> and H<sub>2</sub>.

**Fig. S2** The UV-Raman spectra spectra for GCN and MG<sub>x</sub> ( $x = 1.0, 2.0, 3.0, 7.5, 15$ )

**Fig. S3** (a-b) SEM images of GCN, (c) The photo of GCN samples; (e-d) SEM images of MG<sub>3.0</sub>, (f) The photo of MG<sub>3.0</sub> samples.

**Fig. S4** (a) TEM images of carbon nitride nanosheet MG<sub>3.0</sub> along with the energy-dispersive X-ray (EDX) spectrum.

**Fig. S5** (a) H<sub>2</sub> evolution for GCN, MG<sub>3.0</sub> without HNO<sub>3</sub> treatment, MG<sub>3.0</sub> with HNO<sub>3</sub> treatment; (b) CO<sub>2</sub> reduction for GCN, MG<sub>3.0</sub> without HNO<sub>3</sub> treatment, MG<sub>3.0</sub> with HNO<sub>3</sub> treatment.

**Fig. S6** (a) XRD patterns and (b) FTIR spectra of MG<sub>3.0</sub> before and after the photocatalytic H<sub>2</sub> generation.

**Table S1** Elemental contents and C/N atomic ratio of GCN and MG<sub>3.0</sub> by elemental analyzer.

**Table S2** Comparison of H<sub>2</sub> evolution rate for the carbon nitride nanosheet and reported carbon nitride base photocatalysts.

**Section S1** The procedure to achieve the valence band potential ( $E_{VB}$ ) and conduction band potential ( $E_{CB}$ ) values.

**Section S2** The discussion for the preferential formation of CO in the photocatalytic CO<sub>2</sub> reduction.

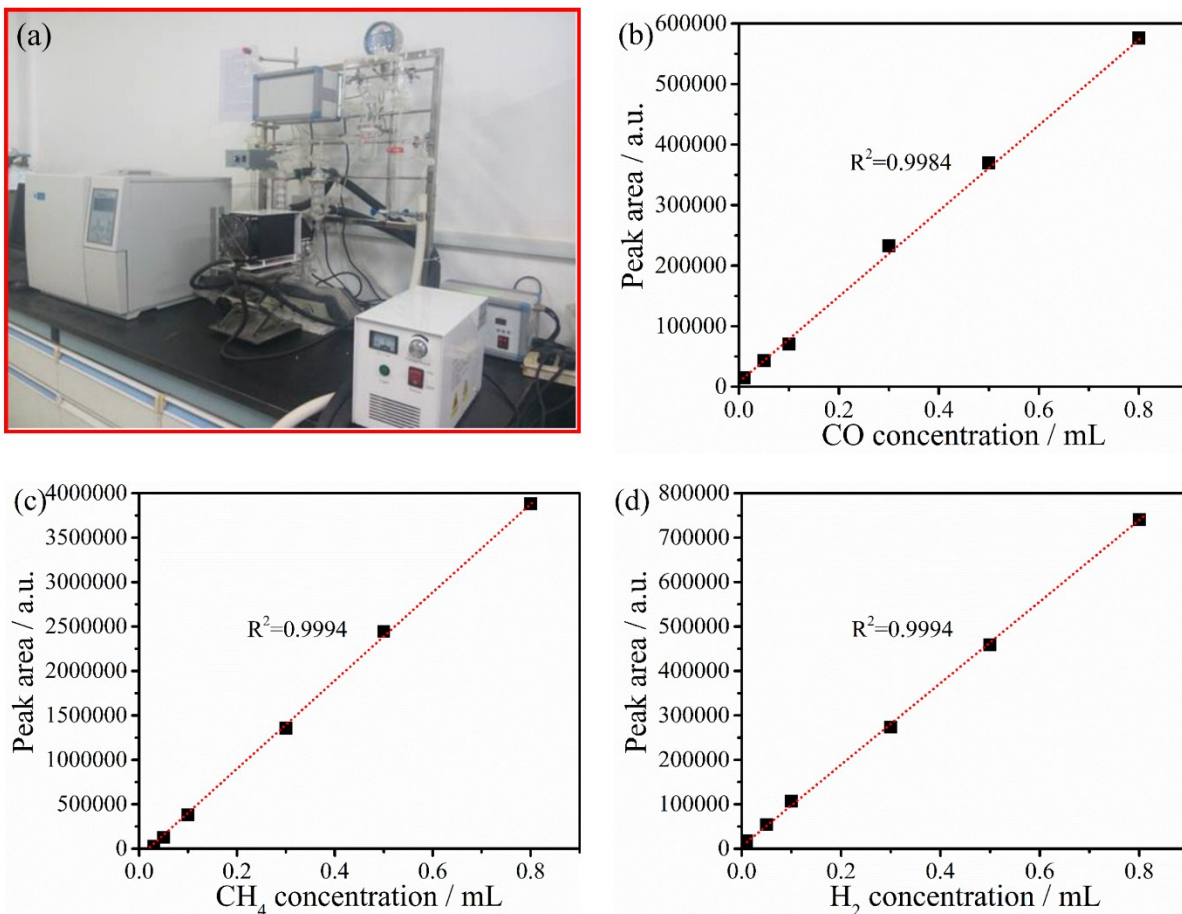

**Fig. S1** (a) Photocatalytic experimental apparatus; (b-d) GC7900 gas chromatography calibration curves for CO, CH<sub>4</sub> and H<sub>2</sub>.

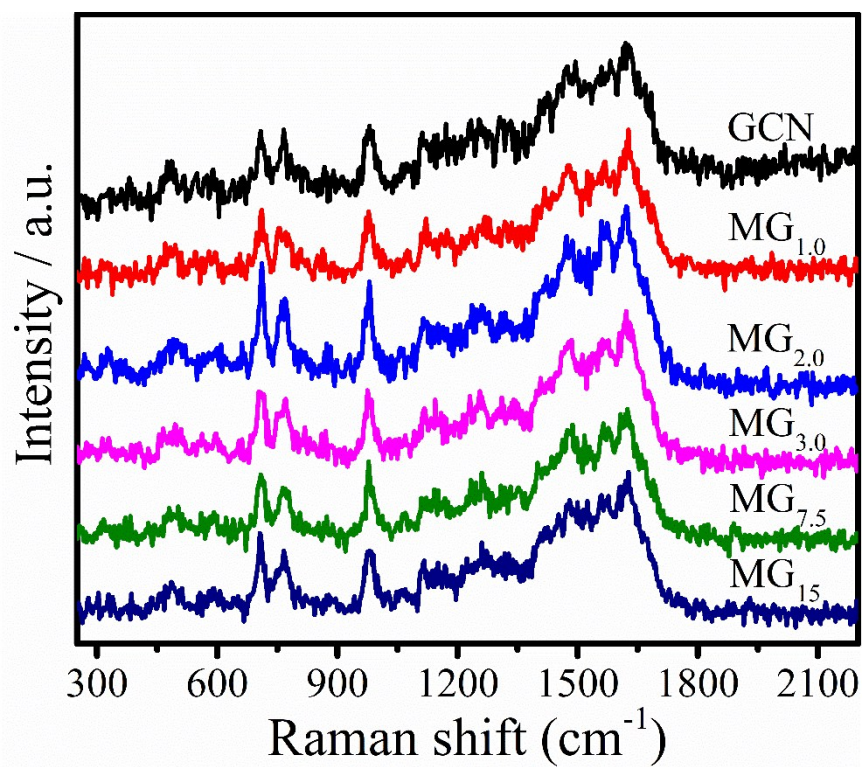

**Fig. S2** The UV-Raman spectra spectra for GCN and MG<sub>x</sub> ( $x = 1.0, 2.0, 3.0, 7.5, 15$ )

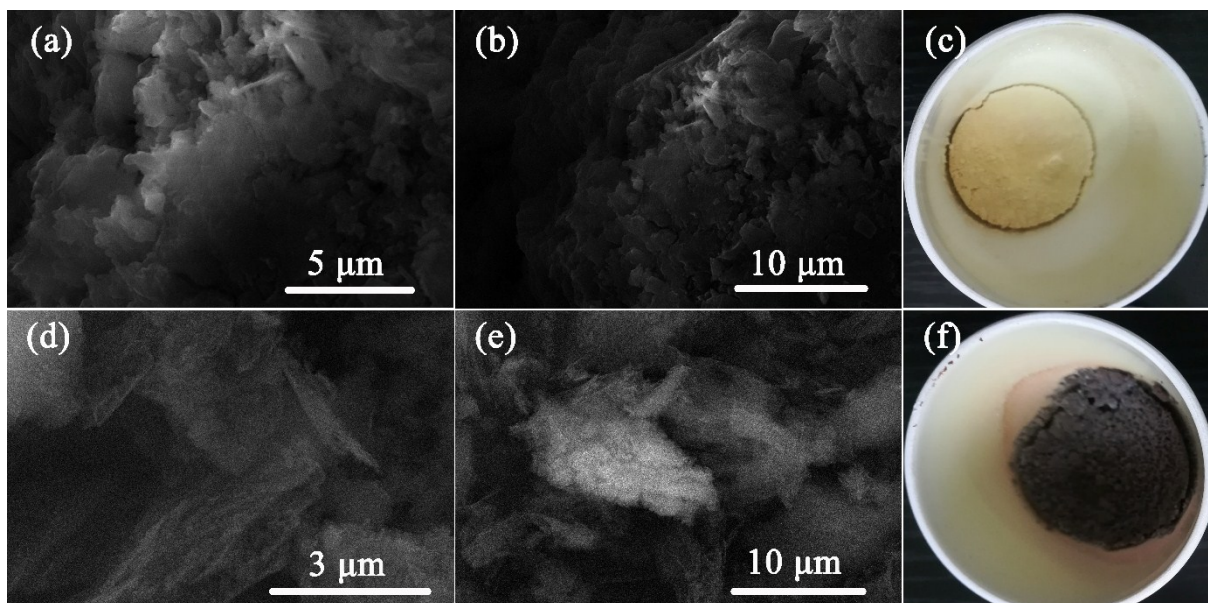

**Fig. S3** (a-b) SEM images of GCN, (c) The photo of GCN samples; (e-d) SEM images of MG<sub>3.0</sub>, (f) The photo of MG<sub>3.0</sub> samples.

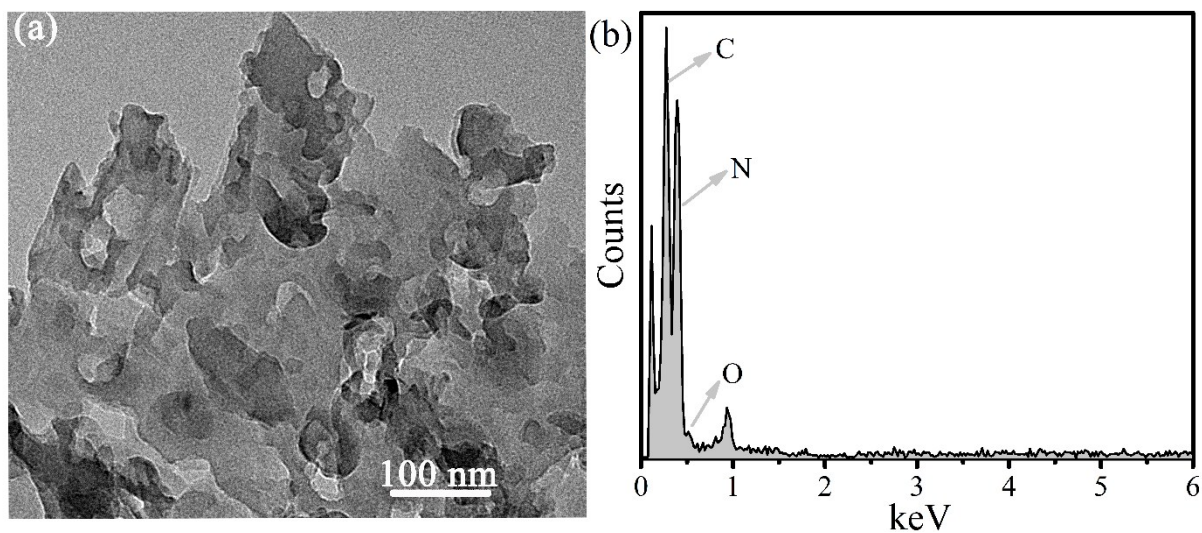

**Fig. S4** (a) TEM images of carbon nitride nanosheet  $MG_{3.0}$  along with the energy-dispersive X-ray (EDX) spectrum.

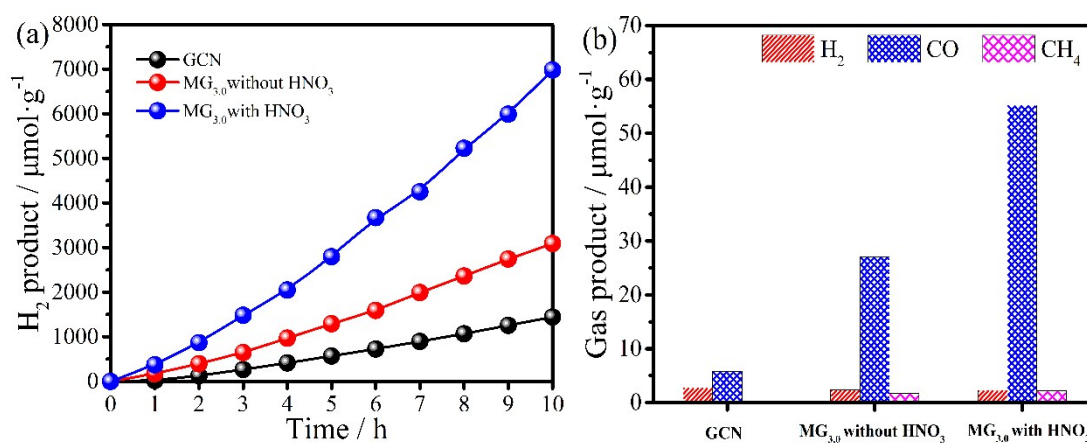

**Fig. S5** (a) H<sub>2</sub> evolution for GCN,  $MG_{3.0}$  without HNO<sub>3</sub> treatment,  $MG_{3.0}$  with HNO<sub>3</sub> treatment; (b) CO<sub>2</sub> reduction for GCN,  $MG_{3.0}$  without HNO<sub>3</sub> treatment,  $MG_{3.0}$  with HNO<sub>3</sub> treatment.

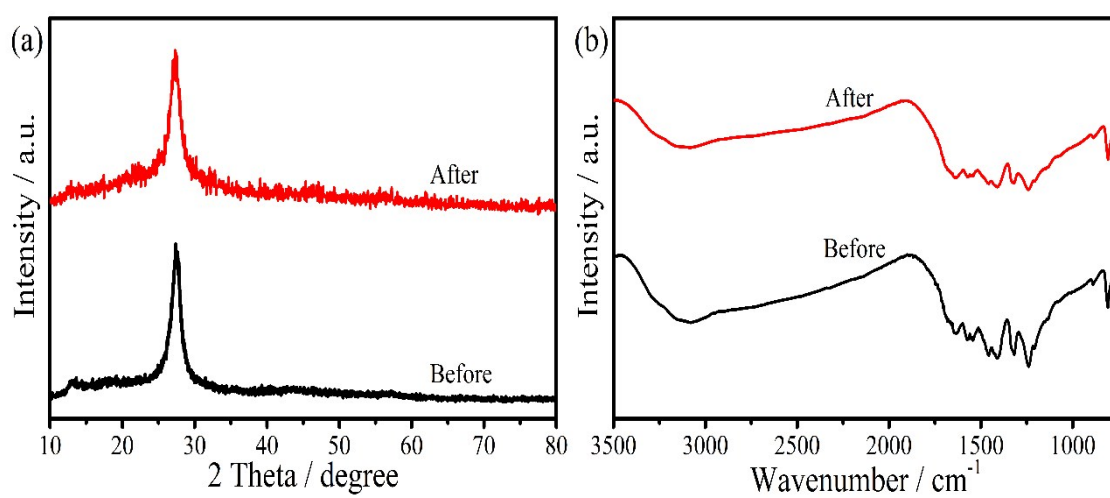

**Fig. S6** (a) XRD patterns and (b) FTIR spectra of MG<sub>3.0</sub> before and after the photocatalytic H<sub>2</sub> generation.

**Table S1** Elemental contents and C/N atomic ratio of GCN and MG<sub>3.0</sub> by elemental analyzer.

| <b>Samples</b>          | <b>N (wt %)</b> | <b>C (wt %)</b> | <b>C/N</b> |
|-------------------------|-----------------|-----------------|------------|
| <b>GCN</b>              | 60.274          | 35.781          | 0.693      |
| <b>MG<sub>3.0</sub></b> | 57.083          | 37.547          | 0.767      |



**Table S2** Comparison of H<sub>2</sub> evolution rate for the carbon nitride nanosheet and reported carbon nitride base photocatalysts.

| Photocatalyst                                                          | HER / $\mu\text{mol}\cdot\text{g}^{-1}\cdot\text{h}^{-1}$ | Catalyst dose / mg | Cocatalyst dose | Reaction solution                                       | Light source                 | References |
|------------------------------------------------------------------------|-----------------------------------------------------------|--------------------|-----------------|---------------------------------------------------------|------------------------------|------------|
| <b>MG<sub>3.0</sub></b>                                                | 698.4                                                     | 30                 | 3wt% Pt         | 90 mL H <sub>2</sub> O & 10 mL TEOA                     | 300 W Xe lamp<br>(>420 nm)   | This work  |
| <b>g-C<sub>3</sub>N<sub>4</sub> nanosheet</b>                          | 646                                                       | 50                 | 1wt% Pt         | 72 mL H <sub>2</sub> O & 8 mL lactic acid               | 12 W LED (420 nm)            | 1          |
| <b>CCN-1</b>                                                           | 529                                                       | 100                | 3wt% Pt         | 90 mL H <sub>2</sub> O & 10 mL TEOA                     | 300 W Xe lamp<br>(>420 nm)   | 2          |
| <b>5 wt% g-PAN/g-C<sub>3</sub>N<sub>4</sub></b>                        | 370                                                       | 100                | 1.5wt% Pt       | 270 mL H <sub>2</sub> O & 30mL TEOA                     | 300 W Xe lamp<br>(> 400 nm)  | 3          |
| <b>20%BM/CNNs</b>                                                      | 563.4                                                     | 100                | 3 wt% Pt        | 90 mL H <sub>2</sub> O & 10 mL TEOA                     | 300 W Xe lamp<br>(> 420 nm)  | 4          |
| <b>TSCN</b>                                                            | 630                                                       | 40                 | 3 wt% Pt        | 80 mL H <sub>2</sub> O & 10 mL TEOA                     | 300 W Xe lamp<br>(> 420 nm)  | 5          |
| <b>CN-I<sub>1.0</sub></b>                                              | 760                                                       | 50                 | 3wt% Pt         | 90 mL H <sub>2</sub> O & 10 mL TEOA                     | 300 W Xe lamp<br>(> 420 nm)  | 6          |
| <b>CN-S<sub>2.0</sub></b>                                              | 650                                                       | 50                 | 3wt% Pt         | 90 mL H <sub>2</sub> O & 10 mL TEOA                     | 300 W Xe lamp<br>(> 420 nm)  | 7          |
| <b>10 wt% In<sub>2</sub>O<sub>3</sub>/g-C<sub>3</sub>N<sub>4</sub></b> | 197.5                                                     | 5                  | 0.5wt% Pt       | 10 mL H <sub>2</sub> O containing 0.1 M L-ascorbic acid | 300 W Xe lamp<br>(> 420 nm)  | 8          |
| <b>CNF-0.5</b>                                                         | 127.5                                                     | 100                | 3wt% Pt         | 90 mL H <sub>2</sub> O & 10 mL TEOA                     | 500 W HBO lamp<br>(> 420 nm) | 9          |

|                     |       |     |         |                                      |                             |    |
|---------------------|-------|-----|---------|--------------------------------------|-----------------------------|----|
| <b>CN-20/0D-ZnO</b> | 322   | 100 | 1wt% Pt | 90 mL H <sub>2</sub> O & 10 mL TEOA  | 300 W Xe lamp<br>(> 420 nm) | 10 |
| <b>Ce-CN-5</b>      | 292.5 | 50  | 1wt% Pt | 180 mL H <sub>2</sub> O & 20 mL TEOA | 300 W Xe lamp<br>(> 420 nm) | 11 |
| <b>GCNS</b>         | 100   | 100 | 3wt% Pt | 90 mL H <sub>2</sub> O & 10 mL TEOA  | 300 W Xe lamp<br>(> 420 nm) | 12 |

**Section S1** The procedure to achieve the valence band potential ( $E_{VB}$ ) and conduction band potential ( $E_{CB}$ ) values.

The empirical equations of the  $E_{VB}$  and  $E_{CB}$  of a semiconductor material,

$$E_{VB} = \chi - E_e + 0.5E_g; E_{CB} = E_{VB} - E_g,$$

where  $\chi$  is the absolute electronegativity of carbon nitride semiconductor, which is the geometric average of the absolute electronegativity of the constituent atoms ( $\approx 4.55$  eV).  $E_e$  is the energy of free electrons on the hydrogen scale ( $\approx 4.5$  eV), and  $E_g$  is the band gap energy of the semiconductor.

**Section S2** The discussion for the preferential formation of CO in the photocatalytic CO<sub>2</sub> reduction.

As we all know, photocatalytic CO<sub>2</sub> reduction to different products (e.g., CO, CH<sub>4</sub>, HCOOH, CH<sub>3</sub>OH, CH<sub>3</sub>CH<sub>2</sub>OH, etc.) requires different reduction potentials as listed in equations (1-5)<sup>13-14</sup>. Noted that the reduction potentials can be comparable to the proton reduction (6) and are less negative than the conduction band potential of carbon nitride. It seems to be that these reactions are feasible.

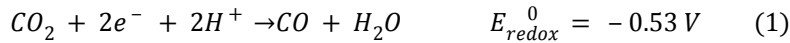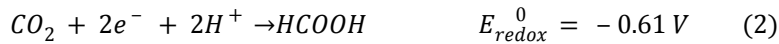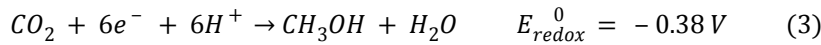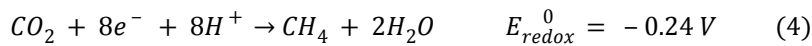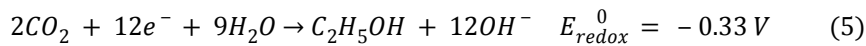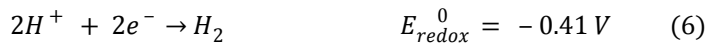

However, CO<sub>2</sub> reduction is a proton-assisted transfer of multiple electrons, involving a series of elementary reaction steps. For example, the pathway for CO<sub>2</sub> reduction to methane (CH<sub>4</sub>) involves eight elementary reaction steps as listed in equations (7-14)<sup>15</sup>.

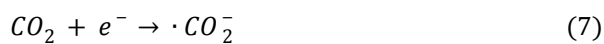

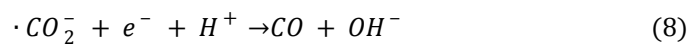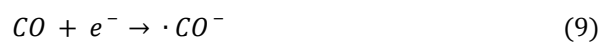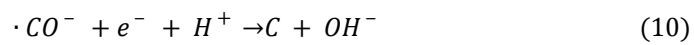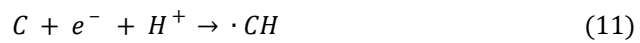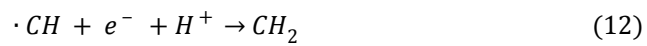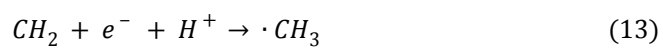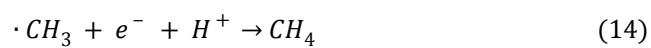

## REFERENCES

- 1 X. H. Wu, D. D. Gao, H. G. Yu, J. G. Yu, *Nanoscale*, 2019, DOI: 10.1039/c9nr00887j.
- 2 H. L. Li, F. P. Li, Z. Y. Wang, Y. C. Jiao, Y. Y. Liu, P. Wang, X. Y. Zhang, X. Y. Qin, Y. Dai, B. B. Huang, *Appl. Catal. B: Environ.*, 2018, **229**, 114-120.
- 3 F. He, G. Chen, Y. G. Yu, S. Hao, Y. S. Zhou, Y. Zheng, *ACS Appl. Mater. Interfaces*, 2014, **6**, 7171-7179.
- 4 J. Li, Y. C. Yin, E. Z. Liu, Y. N. Ma, J. Wan, J. Fan, X. Y. Hu, *J. Hazard. Mater.*, 2017, **321**, 183-192.
- 5 Z. W. Tong, D. Yang, Z. Li, Y. H. Nan, F. Ding, Y. C. Shen, Z. Y. Jiang, *ACS Nano*, 2017, **11**, 1103-1112.
- 6 G. G. Zhang; M. W. Zhang, X. X. Ye, X. Q. Qiu, S. Lin, X. C. Wang, *Adv. Mater.* 2014, **26**, 805-809.
- 7 J. S. Zhang, M. W. Zhang, G. G. Zhang, X. C. Wang, *ACS Catal.* 2012, **2**, 940-948.
- 8 S. W. Cao, X. F. Liu, Y. P. Yuan, Z. Y. Zhang, Y. S. Liao, J. Fang, S. C. J. Loo, T. C. Sum, C. Xue, *Appl. Catal. B: Environ.* 2014, **147**, 940-946.
- 9 Y. Wang, Y. Dai, M. Antonietti, H. R. Li, X. F. Chen, X. C. Wang, *Chem. Mater.* 2010, **22**, 5119-5121.
- 10 J. Wang, Y. Xia, H. Y. Zhao, G. F. Wang, L. Xiang, J. L. Xu, S. Komarneni, *Appl. Catal. B: Environ.*, 2017, **206**, 406-416.
- 11 J. Chen, S. H. Shen, P. Wu, L. J. Guo, *Green Chem.*, 2015, **17**, 509-517.
- 12 X. C. Wang, K. Maeda, A. Thomas, K. Takanebe, G. Xin, J. M. Carlsson, K. Domen, M. Antonietti *Nature*, 2009, **8**, 76-80.
- 13 N. M. Dimitrijevic, B. K. Vijayan, O. G. Poluektov, T. Rajh, K. A. Gray, H. He, P. Zapol, *J. Am. Chem. Soc.*, 2011, **133**, 3964-3971.
- 14 V. P. Indrakanti, J. D. Kubicki, H. H. Schobert, *Energy Environ. Sci.*, 2009, **2**, 745-758.
- 15 M. Anpo, H. Yamashita, Y. Ichihashi, S. Ehara, *J. Electroanal. Chem.*, 1995, **396**, 21-26.
